# Supplementary material for: Impact of C-Terminal Chemistry on Self-Assembled Morphology of Guanosine Containing Nucleopeptides
Source: Molecules. 2020 Nov 24;25(23):5493. doi: 10.3390/molecules25235493 (PMC7727710; doi:10.3390/molecules25235493)
Supplement: Supplementary file 1 [file molecules-25-05493-s001.pdf]

# Supplementary Materials: Impact of C-terminal Chemistry on Self-assembled Morphology of Guanosine Containing Nucleopeptides

Katherine Boback, Katherine Bacchi, Sarah O'Neill, Samantha Brown, Jovelt Dorsainvil and Jillian E. Smith-Carpenter \*

Department of Chemistry and Biochemistry, Fairfield University, 1073 N. Benson Rd, Fairfield, CT 06824, USA; kboback21@amherst.edu (K.B.); katherine.bacchi@student.fairfield.edu (K.B.); sarah.oneill@student.fairfield.edu (S.O.); samantha.brown2@student.fairfield.edu (S.B.); jovelt.dorsainvil@student.fairfield.edu (J.D.)

\* Correspondence: jsmith-carpenter@fairfield.edu; Tel.: +205-254-4000

## Supporting Materials Contents:

|                                                                                            |   |
|--------------------------------------------------------------------------------------------|---|
| <sup>1</sup> H NMR of 2',3'-O-isopropylidene-guanosine-5'-carboxylic acid (Figure S1)..... | 2 |
| HPLC and MALDI-TOF of gsGKFF-OH (Figure S2) .....                                          | 2 |
| <sup>1</sup> H NMR of gsGKFF-OH (Figure S3) .....                                          | 3 |
| HPLC and MALDI-TOF of gsGKFF-NH <sub>2</sub> (Figure S4) .....                             | 3 |
| <sup>1</sup> H NMR of gsGKFF-NH <sub>2</sub> (Figure S5) .....                             | 4 |
| Vial inversion test (Figure S6) .....                                                      | 4 |
| Second derivative FTIR spectrum (Figure S7) .....                                          | 5 |
| Nanofiber width distribution (Figure S8) .....                                             | 5 |

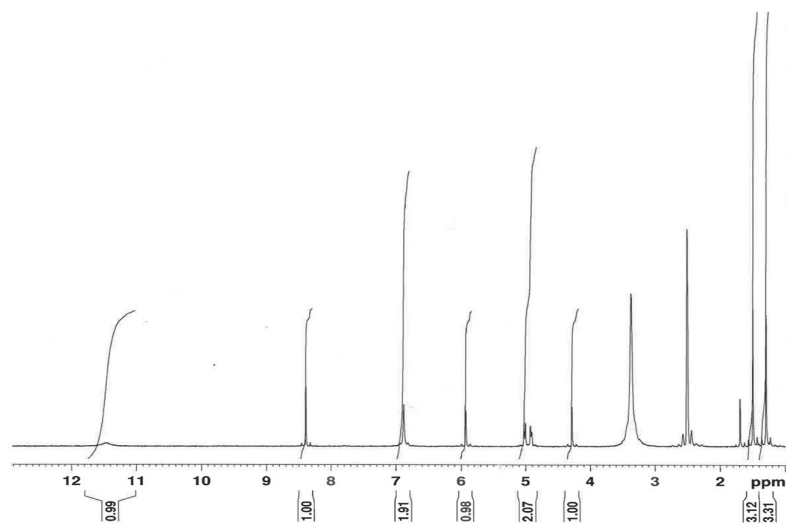

**Figure S1:**  $^1\text{H}$  NMR of 2',3'-O-isopropylidene-5'-carboxylic acid.

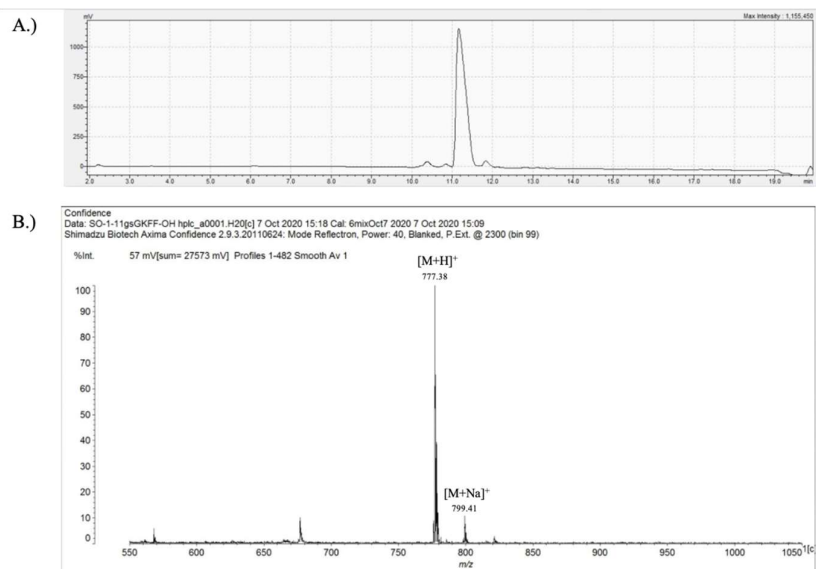

**Figure S2.** Characterization of purified gsGKFF-OH. **A)** HPLC chromatogram and **B)** MALDI TOF mass spectrum of gsGKFF-OH. Exact Mass: 776.32 g/mol.

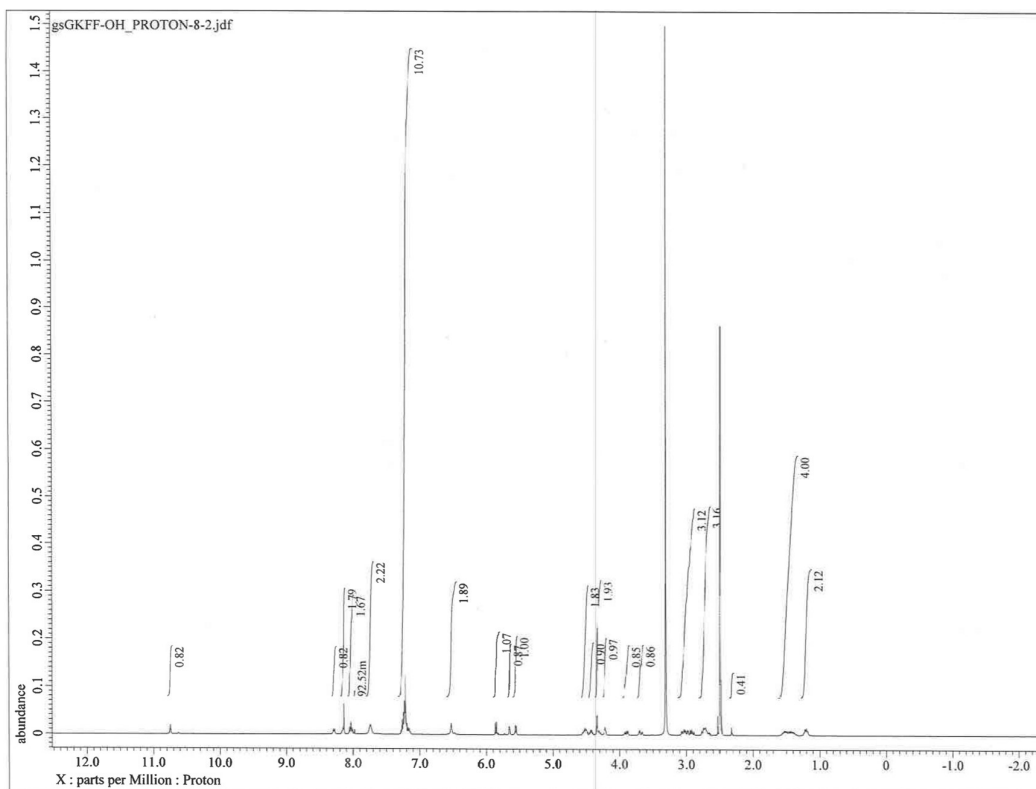

**Figure S3.**  $^1\text{H}$  NMR of purified gsGKFF-OH.

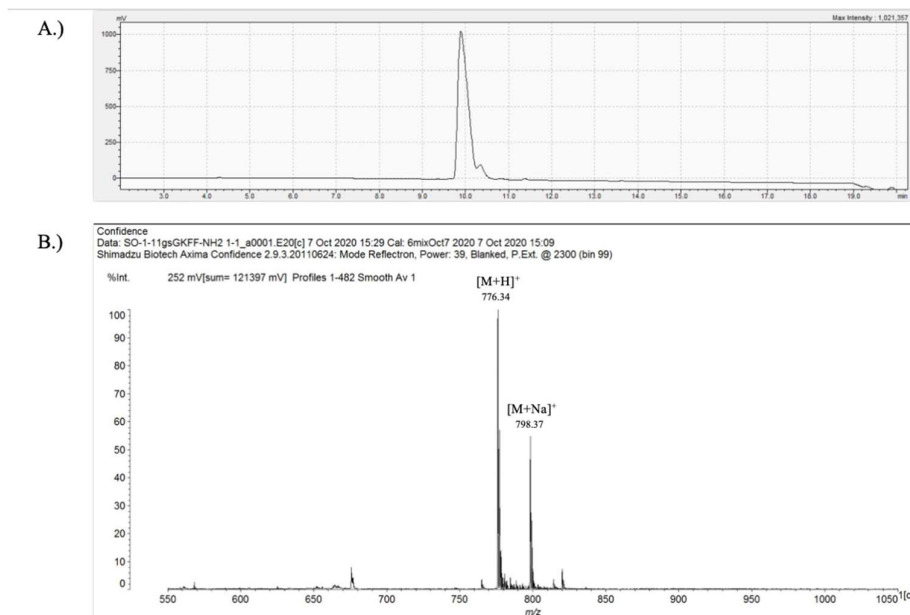

**Figure S4.** Characterization of purified gsGKFF-NH<sub>2</sub>. **A)** HPLC chromatogram and **B)** MALDI TOF mass spectrum of gsGKFF-NH<sub>2</sub>. Exact mass: 775.34 g/mol.

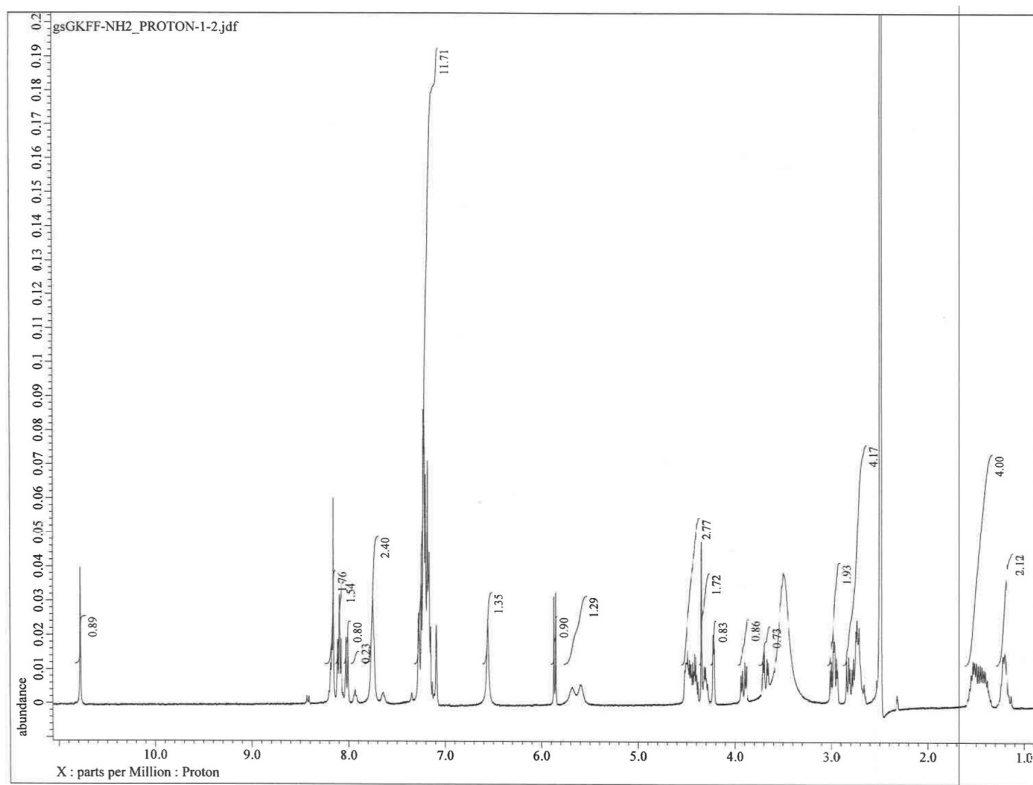

**Figure S5.** <sup>1</sup>H NMR of purified gsGKFF-NH<sub>2</sub>.

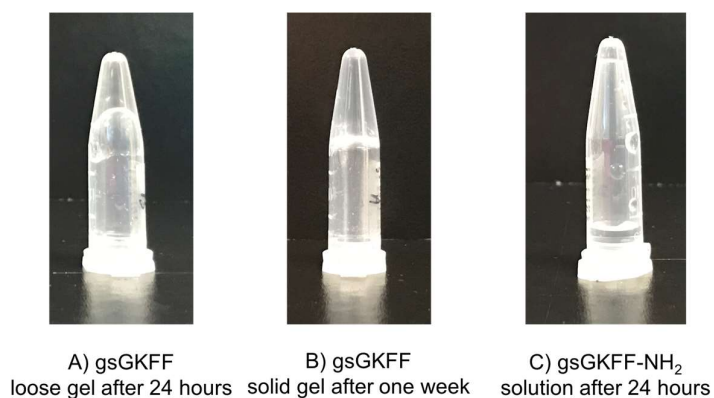

**Figure S6.** Vial inversion test of nucleopeptides assembled in 20% acetonitrile (*v/v*). Nucleopeptide gsGKFF-OH is a loose gel after 24 hours (**A**) but over time stiffens to a transparent gel that holds in place during vial inversion. The hydrogel remains transparent and stable after 1 week (**B**). The assembled gs-GKFF-NH<sub>2</sub> remains soluble and remains a solution after 24 hours (**C**) and longer.

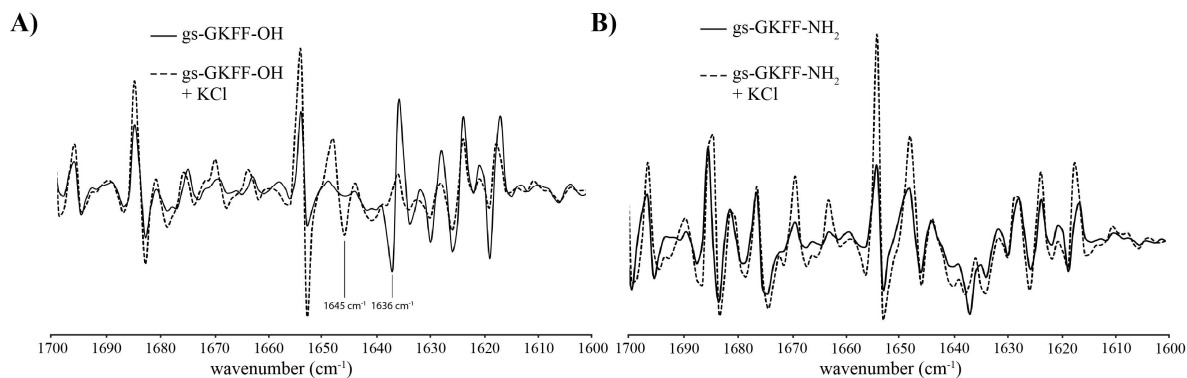

**Figure S7.** Second derivative FTIR spectra in the absence of KCl (solid line) and presence of 1 eq. KCl (dashed line) for nucleopeptide assemblies of gs-GKFF-OH (**A**) and gs-GKFF-NH<sub>2</sub> (**B**) after one week of assembly.

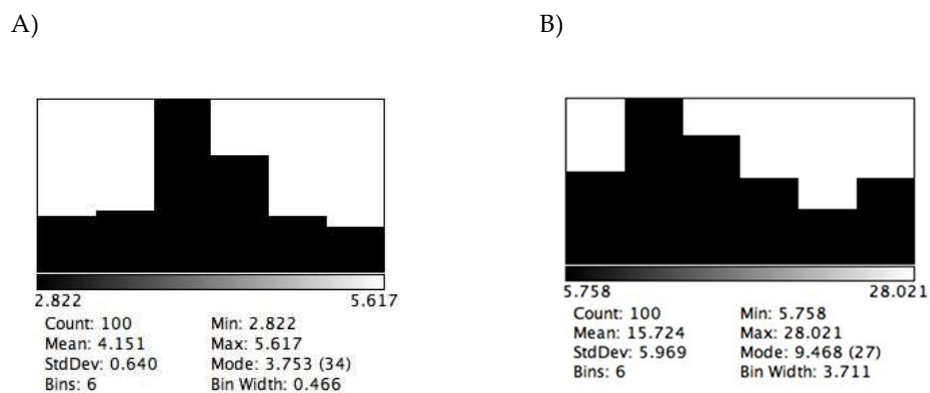

**Figure S8.** Nanofiber widths measured from TEM of gs-GKFF-OH assembled with 1 eq. KCl in 20% acetonitrile (*v/v*). Measurements were taken of both individual striations seen within nanofibers (**A**) and width of nanofibers (**B**). Widths were measured using ImageJ [1].

## References

- 1) C. A. Schneider, W. S. Rasband, K. W. Eliceiri. "NIH Image to ImageJ: 25 Years of image analysis. Nat. Methods **2012**, 9, 671-675.
